# Supplementary material for: Forensic effectiveness and genetic distribution of 20 non-CODIS STRs and D3S1358 in Guangdong Han population
Source: Springer Nature journal article supplement (doi:10.1007/s00414-019-02094-1), 2019-06-07
Supplement: MOESM2 [file 16781082]

## Sheet: Sheet1
Table S1.	Allele frequencies and forensic parameters of 21 STR loci in Guangdong Han population (n=503)
Allele	D4S2366	D6S477	GATA198B05	D15S659	D8S1132	D3S1358	D3S3045	D14S608	D17S1290	D3S1744	D2S441	D18S535	D13S325	D7S1517	D10S1435	D11S2368	D19S253	D1S1656	D7S3048	D10S1248	D5S2500
5								0.00198807
6								0.0934394				0.000994036
7								0.190855									0.15507
8				0.0129225				0.0159046			0.000994036				0.0149105		0.0337972			0.00198807
9	0.360835			0.000994036			0.365805	0.114314				0.2167			0.000994036		0.0119284				0.00497018
10	0.0626243	0.0149105		0.0129225			0.0258449	0.244533	0.0576541		0.224652	0.0347913			0.0397614		0.0168986	0.00198807			0.0139165
10.1											0.000994036
10.3									0.000994036
11	0.314115	0.00596421		0.148111			0.0337972	0.184891	0.0457256		0.331014	0.0129225			0.139165		0.146123	0.0685885		0.000994036	0.287276
11.3											0.0626243
12	0.11829	0.0636183		0.192843			0.132207	0.107356	0.0109344	0.000994036	0.196819	0.083499			0.393638		0.32505	0.0367793		0.0695825	0.178926
12.3											0.000994036
13	0.0785288	0.212724		0.133201		0.00198807	0.267396	0.0417495	0.00894632	0.0218688	0.0258449	0.244533			0.253479		0.22664	0.0904573		0.366799	0.0337972
13.2
14	0.0616302	0.183897	0.00795229	0.0477137		0.0367793	0.134195	0.00397614	0.0248509	0.100398	0.142147	0.269384			0.136183		0.0656064	0.10338		0.237575	0.083499
14.3															0.00198807
15	0.00397614	0.298211	0.0328032	0.128231		0.345924	0.0367793	0.000994036	0.190855	0.0675944	0.0139165	0.122266		0.000994036	0.0178926	0.00795229	0.0149105	0.292247		0.192843	0.303181
15.2
16		0.17495	0.0864811	0.196819	0.0129225	0.319085	0.00298211		0.271372	0.082505		0.0139165	0.00198807	0.00298211	0.00198807	0.0328032		0.233598		0.106362	0.0755467
16.2									0.00298211
16.3																		0.00298211
17		0.0387674	0.156064	0.0964215	0.109344	0.234592	0.000994036		0.198807	0.309145		0.000994036	0.00994036	0.00894632		0.141153		0.0695825	0.00596421	0.0218688	0.0159046
17.3										0.000994036								0.0656064
18		0.00397614	0.0944334	0.0258449	0.202783	0.055666			0.0994036	0.204771			0.0467197	0.0139165		0.114314	0.00198807	0.0159046	0.0944334	0.00198807	0.00298211
18.3																		0.0139165
19		0.00198807	0.0785288	0.00397614	0.199801	0.00596421			0.0646123	0.145129			0.220676	0.0636183		0.170974		0.00298211	0.0785288
19.2		0.000994036
19.3																		0.00198807
20			0.0984095		0.152087				0.0159046	0.0606362			0.270378	0.131213		0.178926			0.197813
20.3					0.000994036											0.000994036
21			0.244533		0.127237				0.00397614	0.00497018			0.234592	0.153082		0.220676			0.153082
22			0.166998		0.104374				0.00298211	0.000994036			0.130219	0.135189		0.0854871	0.00198807		0.111332
23			0.027833		0.0586481								0.0536779	0.137177		0.0347913			0.142147
24			0.00497018		0.026839								0.0258449	0.0904573		0.0109344			0.127237
25			0.000994036		0.00198807								0.00298211	0.177932					0.0705765
26					0.00298211								0.000994036	0.0497018					0.0139165
27													0.00198807	0.026839		0.000994036			0.00497018
28														0.00695825
29														0.000994036
TPI	1.81	2.4	3.44521	3.30921	3.26623	1.63312	2.1681	3.10494	2.64737	2.67553	2.11345	2.35047	2.76374	3.86923	2.02823	3.54225	2.14957	2.61979	4.05645	2.22566	2.7043
PD	0.894	0.928	0.961405	0.960669	0.957697	0.871503	0.9023	0.950243	0.947389	0.941666	0.914252	0.928718	0.927461	0.96927	0.891652	0.957349	0.928821	0.947903	0.9661	0.899944	0.915398
PIC	0.7	0.77	0.837605	0.83848	0.835032	0.667759	0.720155	0.813235	0.809318	0.793385	0.742636	0.767369	0.771548	0.861804	0.702403	0.828837	0.762847	0.80554	0.854036	0.718075	0.746868
PE	0.466	0.583	0.704487	0.69271	0.6888	0.418791	0.543507	0.673238	0.619864	0.623616	0.533004	0.575643	0.634929	0.736198	0.515737	0.712374	0.539994	0.616122	0.748194	0.554116	0.627377
MP	0.106	0.072	0.0385955	0.0393306	0.0423028	0.128497	0.0977001	0.0497571	0.0526108	0.0583339	0.0857479	0.071282	0.0725389	0.0307301	0.108348	0.0426507	0.0711793	0.052097	0.0339	0.100056	0.0846017
He	0.743974	0.796352	0.854621	0.85621	0.852993	0.719712	0.756779	0.835083	0.828923	0.815994	0.734665	0.797976	0.801155	0.875713	0.740947	0.847771	0.792261	0.815311	0.869191	0.755938	0.780013
Ho	0.723658	0.791252	0.854871	0.848907	0.846918	0.693837	0.769384	0.838966	0.809145	0.813121	0.723658	0.787276	0.819085	0.870775	0.753479	0.858847	0.767396	0.799205	0.87674	0.775348	0.815109
p-HWE	0.1455	0.3293	0.797	0.5848	0.0893	0.1037	0.3379	0.5693	0.031	0.3583	0.1342	0.594	0.4785	0.2907	0.7966	0.4653	0.0607	0.4417	0.481	0.7432	0.715
TPI:Typical paternity index; PD:Power of discrimination; PIC:Polymorphism information content; PE:Power of exclusion; MP:Matching probability; He:Expected heterozygosity; Ho:Observed heterozygosity; p-HWE:P:Pvalues of exact test for Hardy-Weinberg Equilibrium.
